# Supplementary material for: Distinct signatures of gut microbiota and metabolites in different types of diabetes: a population-based cross-sectional study
Source: PubMed Central journal article supplement — eClinicalMedicine. 2023 Aug 3;62:102132. doi: 10.1016/j.eclinm.2023.102132 (PMC10430172; doi:10.1016/j.eclinm.2023.102132), 2023-08-03
Supplement: mmc1.pdf [file mmc1.pdf]

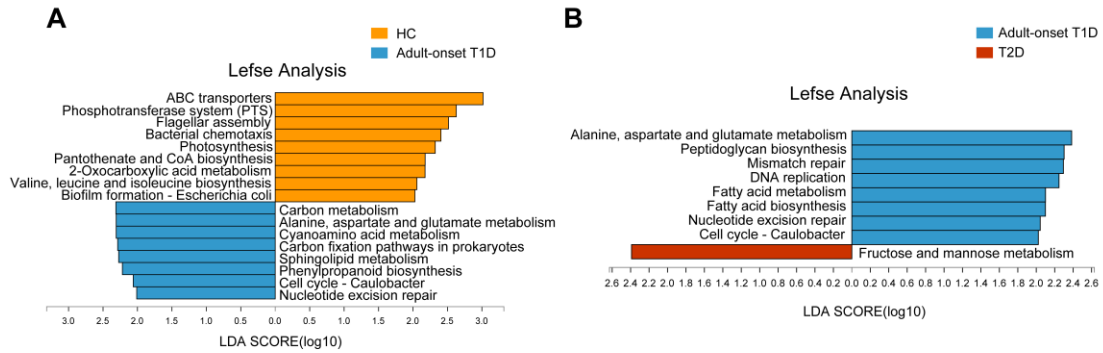

**Supplementary Figure 1. Gut microbiota functional alterations in adult-onset T1D.**

KEGG pathway analysis of differentially abundant gut microbiota between patients with adult-onset T1D and HCs (A) and between patients with adult-onset T1D and T2D (B). Pathways with LDA value  $> 2$  and  $P < 0.05$  were considered differentially abundant. Abbreviations: KEGG, Kyoto Encyclopedia of Genes and Genomes; HC, healthy control; T1D, type 1 diabetes; T2D, type 2 diabetes; LDA, linear discriminant analysis.

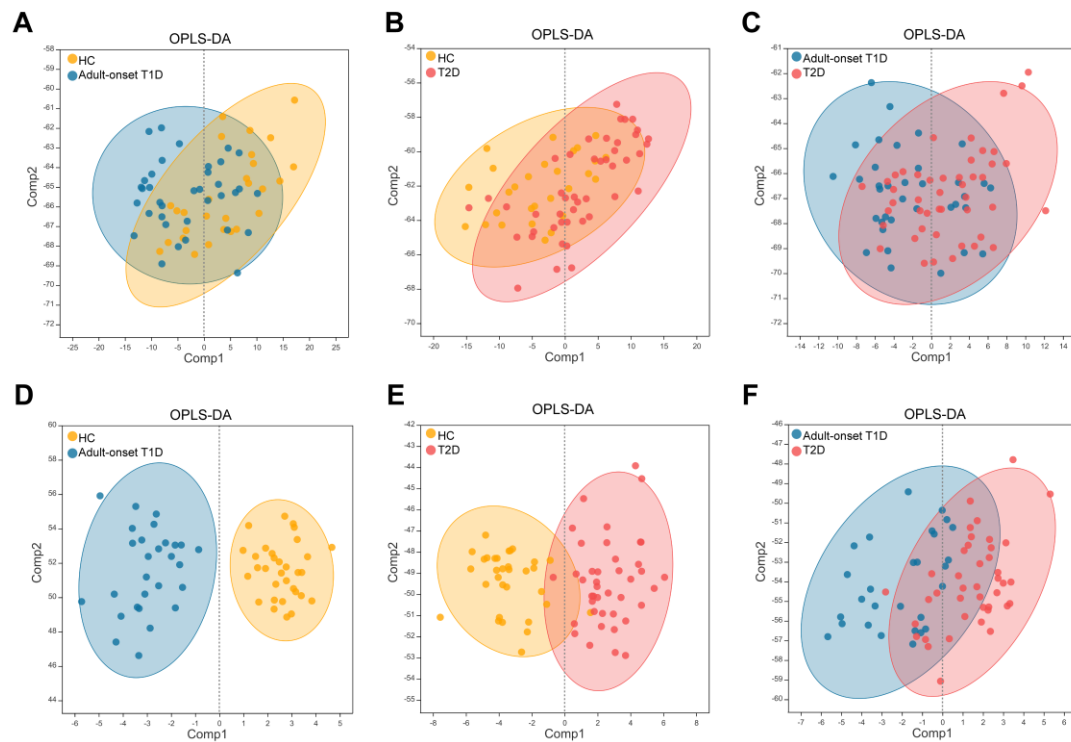

**Supplementary Figure 2. Faecal/serum metabolome profiles assessed by OPLS-DA.** (A-C) Comparisons of the faecal metabolome between the three study groups. (D-F) Comparisons of the serum metabolome between the three study groups. Abbreviations: OPLS-DA, orthogonal partial least squares discriminant analysis; HC, healthy control; T1D, type 1 diabetes; T2D, type 2 diabetes.

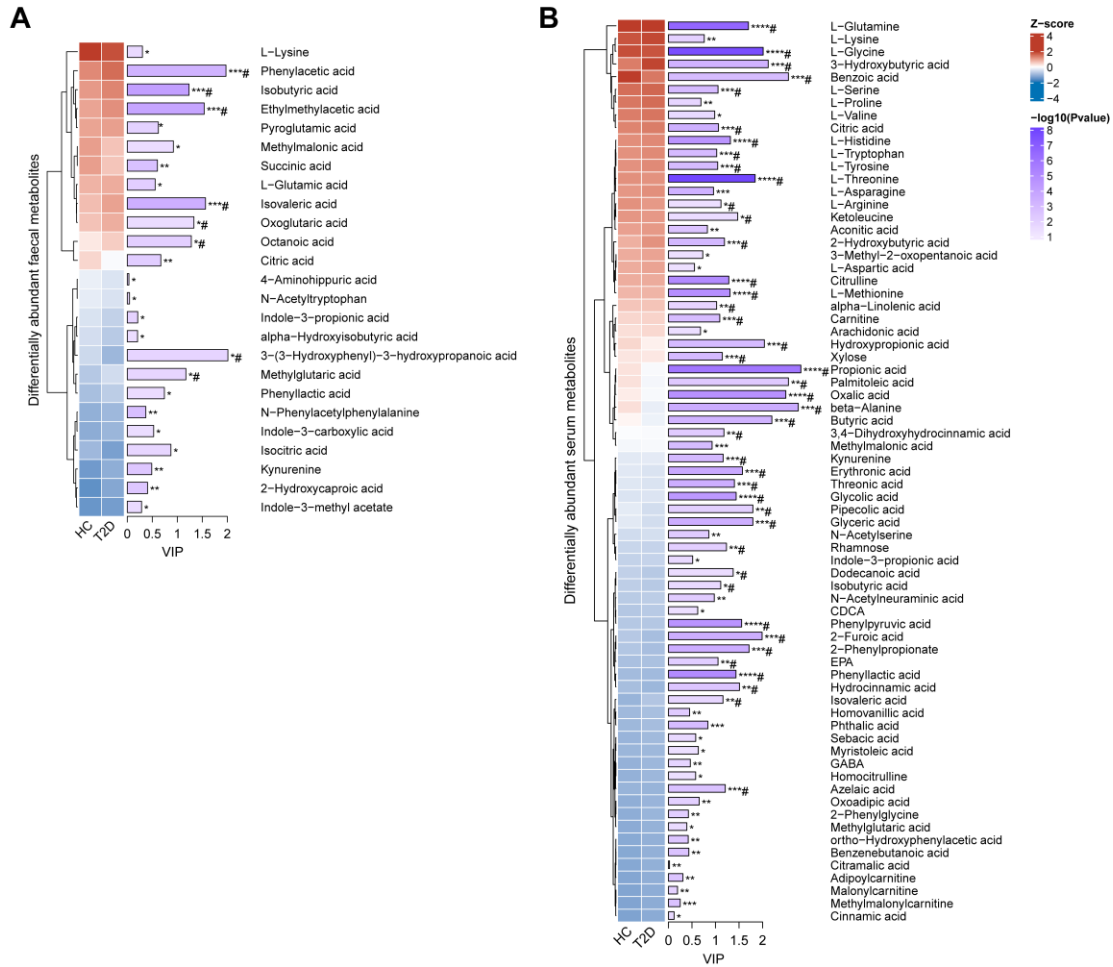

**Supplementary Figure 3. Differentially abundant faecal/serum metabolites in patients with T2D.** (A, B) Differentially abundant faecal/serum metabolites identified by OPLS-DA between T2D patients and HCs. The relative abundance was transformed into Z scores. Altered metabolites were identified by the OPLS-DA. \* $P_{fdr} < 0.1$ , \*\* $P_{fdr} < 0.05$ , \*\*\* $P_{fdr} < 0.01$ , \*\*\*\* $P_{fdr} < 0.001$ , #VIP > 1. Abbreviations: OPLS-DA, orthogonal partial least squares discriminant analysis; VIP, variable influence on projection; HC, healthy control; T1D, type 1 diabetes; T2D, type 2 diabetes.

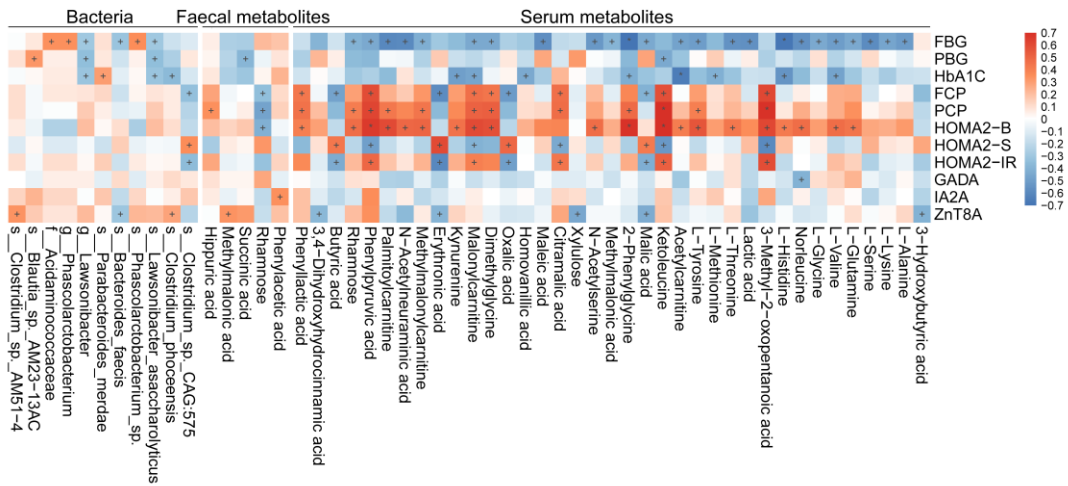

**Supplementary Figure 4. Interactions of disease-related taxa/metabolites and host clinical parameters in adult-onset T1D. Associations of differentially abundant taxa or faecal/serum metabolites and clinical parameters in patients with adult-onset T1D.** Correlations were calculated with Spearman's correlation analysis.  $^+P < 0.05$ ,  $^*P_{fdr} < 0.1$ . Abbreviations: FBG, fasting blood glucose; PBG, postprandial blood glucose; HbA1c, haemoglobin A1c; FCP, fasting C-peptide; PCP, postprandial C-peptide; HOMA2-B, homoeostasis model assessment 2 estimates of  $\beta$ -cell function; HOMA2-S, homoeostasis model assessment 2 estimates of insulin sensitivity; HOMA2-IR, homoeostasis model assessment 2 estimates of insulin resistance; GADA, glutamic acid decarboxylase antibody; IA-2A, insulinoma-associated protein 2 antibody; ZnT8A, zinc transporter 8 antibody; AUC, area under the curve.

**Supplementary Table 1.** Demographics and baseline characteristics of discovery set and validation set.

| Variable                      | Discovery set                |                                 |                                    |                                      | Validation set               |                                 |                                     |                                      |
|-------------------------------|------------------------------|---------------------------------|------------------------------------|--------------------------------------|------------------------------|---------------------------------|-------------------------------------|--------------------------------------|
|                               | Healthy controls<br>(n = 36) | adult-onset T1D<br>(n = 51)     | T2D<br>(n = 56)                    | <i>P</i> value between<br>all groups | Healthy controls<br>(n = 28) | adult-onset T1D<br>(n = 27)     | T2D<br>(n = 20)                     | <i>P</i> value between<br>all groups |
| Age (years)                   | 43.0 (28.5-52.0)             | 40.0 (32.0-48.0)                | 45.5 (35.0-52.0)                   | 0.249                                | 37.5 (30.0, 52.5)            | 34.5 (31.2, 45.8)               | 43.0 (40.8, 52.0)                   | 0.073                                |
| Diabetes duration<br>(months) | /                            | 8.0 (3.0-22.0)                  | 3.0 (1.0-10) <sup>#</sup>          | 0.006                                | /                            | 30.0 (8.2-52.0)                 | 20.5 (8.0-48.0)                     | 0.847                                |
| Male/female (n)               | 17/19                        | 35/16                           | 38/18                              | 0.078                                | 13/15                        | 10/17                           | 7/13                                | 0.674                                |
| BMI (kg/m <sup>2</sup> )      | 22.8 ± 2.2                   | 20.9 ± 2.5*                     | 24.6 ± 3.7 <sup>*#</sup>           | < 0.001                              | 23.3 ± 4.2                   | 21.4 ± 2.6                      | 29.9 ± 5.0 <sup>*#</sup>            | < 0.001                              |
| FBG (mmol/L)                  | 4.8 (4.6-5.2)                | 7.9 (5.1-10.3) <sup>*</sup>     | 7.3 (5.9-10.0) <sup>*</sup>        | < 0.001                              | 4.7 (4.4-4.9)                | 6.8 (6.0-8.0) <sup>*</sup>      | 7.7 (6.3-8.5) <sup>*</sup>          | < 0.001                              |
| PBG (mmol/L)                  | 5.7 (4.8-6.7)                | 14.8 (11.5-18.2) <sup>*</sup>   | 14.1 (10.1-17.7) <sup>*</sup>      | < 0.001                              | /                            | 15.8 (13.8-18.7)                | 13.4 (12.3-16.0)                    | 0.103                                |
| HbA1c (%)                     | 5.4 (5.2-5.6)                | 8.7 (7.0-10.5) <sup>*</sup>     | 8.4 (6.2-10.4) <sup>*</sup>        | < 0.001                              | 5.6 (5.4-5.8)                | 7.2 (6.4-8.5) <sup>*</sup>      | 6.0 (5.7-8.9) <sup>*</sup>          | < 0.001                              |
| FCP (pmol/L)                  | 409.6 (345.0-610.3)          | 135.1 (36.0-220.4) <sup>*</sup> | 524.2 (262.8-689.8) <sup>#</sup>   | < 0.001                              | 354.7 (309.5-462.0)          | 103.3 (61.7-201.6) <sup>*</sup> | 764.8 (591.7-927.5) <sup>#</sup>    | < 0.001                              |
| PCP (pmol/L)                  | 1772.7 (1225.8-2492.5)       | 277.5 (60.6-648.1) <sup>*</sup> | 1229.3 (750.5-2200.8) <sup>#</sup> | < 0.001                              | /                            | 347.0 (160.5-744.3)             | 1571.6 (1285.1-2350.5) <sup>#</sup> | < 0.001                              |

Data are presented as the mean ± SD or median (interquartile range). Chi-squared tests and analysis of variance (ANOVA) with the post hoc correction using the Fisher's lease significant difference method were used as appropriate, or a Kruskal-Wallis test between multiple groups with Bonferroni correction was applied. <sup>\*</sup>versus HC, *P* < 0.05; <sup>#</sup>versus adult-onset T1D, *P* < 0.05. Abbreviations: T1D, type 1 diabetes; T2D, type 2 diabetes; BMI, body mass index; FBG, fasting blood glucose; PBG, postprandial blood glucose; HbA1c, heamoglobin A1c; FCP, fasting C-peptide; PCP, postprandial C-peptide.

**Supplementary Table 2.** The bacteria differentially abundance between patients with adult-onset T1D and HC.

| Species                                                                               | Mean relative abundance |                 | Lefse Analysis |        |
|---------------------------------------------------------------------------------------|-------------------------|-----------------|----------------|--------|
|                                                                                       | HC                      | Adult-onset T1D | LDA score      | FDR    |
| f__Acidaminococcaceae                                                                 | 3.07E-03                | 4.71E-03        | 2.9648         | 0.3448 |
| f__Acidaminococcaceae.g__Phascolarctobacterium                                        | 3.07E-03                | 4.71E-03        | 2.9648         | 0.2226 |
| f__Acidaminococcaceae.g__Phascolarctobacterium.s__Phascolarctobacterium_sp__          | 1.72E-04                | 2.52E-04        | 2.0214         | 0.2663 |
| f__Acidaminococcaceae.g__Phascolarctobacterium.s__Phascolarctobacterium_succinatutens | 4.97E-04                | 7.95E-04        | 2.3671         | 0.2751 |
| f__Bacteroidaceae.g__Bacteroides.s__Bacteroides_cellulosilyticus                      | 1.17E-03                | 2.66E-03        | 3.0256         | 0.0628 |
| f__Bacteroidaceae.g__Bacteroides.s__Bacteroides_faecis                                | 6.27E-04                | 6.96E-04        | 2.1385         | 0.2640 |
| f__Bacteroidaceae.g__Bacteroides.s__Bacteroides_fluxus                                | 4.06E-04                | 9.93E-04        | 2.7220         | 0.1093 |
| f__Bacteroidaceae.g__Bacteroides.s__Bacteroides_intestinalis                          | 1.21E-03                | 2.42E-03        | 2.9830         | 0.0628 |
| f__Bacteroidaceae.g__Bacteroides.s__Bacteroides_sp__                                  | 2.41E-03                | 1.20E-03        | 2.9334         | 0.1645 |
| f__Bacteroidaceae.g__Bacteroides.s__Bacteroides_sp__4_1_36                            | 2.84E-04                | 6.42E-04        | 2.4257         | 0.0953 |
| f__Bacteroidaceae.g__Bacteroides.s__Bacteroides_sp__A1C1                              | 7.00E-05                | 1.31E-04        | 2.4150         | 0.1923 |
| f__Bacteroidaceae.g__Bacteroides.s__Bacteroides_sp__AF26_10BH                         | 3.09E-05                | 8.08E-05        | 2.2587         | 0.0628 |
| f__Bacteroidaceae.g__Bacteroides.s__Bacteroides_sp__AF34_31BH                         | 1.79E-04                | 3.35E-04        | 2.2126         | 0.1923 |
| f__Bacteroidaceae.g__Bacteroides.s__Bacteroides_sp__AR29                              | 1.01E-04                | 2.39E-04        | 2.0988         | 0.0953 |
| f__Bacteroidaceae.g__Bacteroides.s__Bacteroides_sp__D20                               | 3.37E-04                | 7.19E-04        | 2.4247         | 0.1645 |
| f__Bacteroidaceae.g__Bacteroides.s__Bacteroides_stercoris_CAG_120                     | 4.38E-04                | 9.39E-04        | 2.4917         | 0.2595 |
| f__Bacteroidaceae.g__Bacteroides.s__Bacteroides_thetaiotaomicron                      | 5.55E-03                | 9.86E-03        | 3.3565         | 0.2595 |
| f__Bacteroidaceae.g__Bacteroides.s__Bacteroides_uniformis                             | 7.00E-03                | 1.52E-02        | 3.7333         | 0.1093 |
| f__Bacteroidaceae.g__Bacteroides.s__Bacteroides_uniformis_CAG_3                       | 1.28E-04                | 2.89E-04        | 2.1855         | 0.0953 |
| f__Bifidobacteriaceae.g__Bifidobacterium.s__Bifidobacterium_bifidum                   | 1.36E-04                | 1.95E-04        | 2.2933         | 0.2061 |
| f__Clostridiaceae.g__Clostridium.s__Clostridium_disporicum                            | 9.59E-04                | 2.43E-05        | 2.6103         | 0.2542 |

|                                                                                        |          |          |        |        |
|----------------------------------------------------------------------------------------|----------|----------|--------|--------|
| f__Clostridiaceae.g__Clostridium.s__Clostridium_phoceensis                             | 7.14E-05 | 1.32E-04 | 2.1757 | 0.1893 |
| f__Clostridiaceae.g__Clostridium.s__Clostridium_sp__AF28_12                            | 2.34E-04 | 1.36E-04 | 2.2039 | 0.2127 |
| f__Clostridiaceae.g__Clostridium.s__Clostridium_sp__AM25_23AC                          | 3.50E-04 | 1.84E-04 | 2.2477 | 0.1645 |
| f__Clostridiaceae.g__Clostridium.s__Clostridium_sp__AM51_4                             | 2.54E-04 | 1.35E-04 | 2.2455 | 0.1893 |
| f__Clostridiaceae.g__Clostridium.s__Clostridium_sp__CAG_354                            | 1.03E-05 | 2.14E-05 | 2.6970 | 0.2640 |
| f__Clostridiaceae.g__Clostridium.s__Clostridium_sp__CAG_571                            | 2.78E-05 | 6.50E-05 | 2.3411 | 0.1645 |
| f__Clostridiaceae.g__Clostridium.s__Clostridium_sp__CAG_575                            | 2.79E-05 | 4.01E-05 | 2.4128 | 0.2397 |
| f__Clostridiaceae.g__Clostridium.s__Clostridium_sp__SS2_1                              | 4.22E-04 | 2.52E-04 | 2.0755 | 0.2595 |
| f__Clostridiaceae.g__unclassified_f__Clostridiaceae.s__Clostridiaceae_bacterium_TF01_6 | 2.86E-04 | 1.78E-04 | 2.1405 | 0.2127 |
| f__Eggerthellaceae.g__Eggerthella                                                      | 2.32E-05 | 8.12E-05 | 2.0708 | 0.1512 |
| f__Eggerthellaceae.g__Eggerthella.s__Eggerthella_sp__CAG_298                           | 2.32E-05 | 8.12E-05 | 2.0708 | 0.1893 |
| f__Erysipelotrichaceae.g__Catenibacterium                                              | 1.69E-04 | 4.17E-04 | 2.2907 | 0.0644 |
| f__Erysipelotrichaceae.g__Catenibacterium.s__Catenibacterium_mitsuokai                 | 1.69E-04 | 4.17E-04 | 2.2907 | 0.0628 |
| f__Eubacteriaceae.g__Eubacterium.s__Eubacterium_rectale_CAG_36                         | 1.81E-04 | 5.31E-05 | 2.2481 | 0.1085 |
| f__Eubacteriaceae.g__Eubacterium.s__Eubacterium_sp__41_20                              | 1.78E-04 | 5.60E-05 | 2.1721 | 0.1093 |
| f__Eubacteriaceae.g__Eubacterium.s__Eubacterium_sp__CAG_180                            | 6.34E-04 | 6.04E-04 | 2.3948 | 0.2077 |
| f__Eubacteriaceae.g__Eubacterium.s__Eubacterium_sp__CAG_251                            | 2.58E-04 | 6.18E-04 | 2.4294 | 0.2640 |
| f__Lachnospiraceae                                                                     | 1.42E-01 | 9.30E-02 | 4.4290 | 0.1932 |
| f__Lachnospiraceae.g__Anaerostipes                                                     | 4.22E-03 | 2.28E-03 | 2.9950 | 0.2131 |
| f__Lachnospiraceae.g__Anaerostipes.s__Anaerostipes_hadrus                              | 4.22E-03 | 2.28E-03 | 2.9950 | 0.2542 |
| f__Lachnospiraceae.g__Blautia.s__Blautia_sp__AF14_40                                   | 7.38E-05 | 4.32E-05 | 2.3732 | 0.2127 |
| f__Lachnospiraceae.g__Blautia.s__Blautia_sp__AF32_4BH                                  | 2.22E-04 | 1.03E-04 | 2.1938 | 0.2678 |
| f__Lachnospiraceae.g__Blautia.s__Blautia_sp__AM23_13AC                                 | 2.21E-04 | 1.12E-04 | 2.1302 | 0.2640 |
| f__Lachnospiraceae.g__Blautia.s__Blautia_sp__CAG_37                                    | 3.74E-04 | 2.16E-04 | 2.1897 | 0.1645 |
| f__Lachnospiraceae.g__Blautia.s__Blautia_sp__OF09_25XD                                 | 1.16E-04 | 5.46E-05 | 2.2041 | 0.2595 |
| f__Lachnospiraceae.g__Enterocloster.s__Enterocloster_asparagiformis                    | 8.95E-05 | 2.52E-04 | 2.4579 | 0.0628 |

|                                                                                          |          |          |        |        |
|------------------------------------------------------------------------------------------|----------|----------|--------|--------|
| f_Lachnospiraceae.g_Roseburia.s_Roseburia_intestinalis                                   | 9.21E-03 | 4.25E-03 | 3.4721 | 0.2068 |
| f_Lachnospiraceae.g_Roseburia.s_Roseburia_intestinalis_CAG_13                            | 2.65E-04 | 1.24E-04 | 2.2140 | 0.2127 |
| f_Lachnospiraceae.g_Roseburia.s_Roseburia_inulinivorans                                  | 1.17E-02 | 6.02E-03 | 3.4868 | 0.2186 |
| f_Lachnospiraceae.g_unclassified_f_Lachnospiraceae                                       | 4.23E-02 | 2.20E-02 | 4.0579 | 0.0926 |
| f_Lachnospiraceae.g_unclassified_f_Lachnospiraceae.s_Eubacterium_rectale                 | 2.14E-02 | 7.51E-03 | 3.9070 | 0.0923 |
| f_Lachnospiraceae.g_unclassified_f_Lachnospiraceae.s_Lachnospiraceae_bacterium_2_1_58FAA | 8.95E-05 | 4.36E-05 | 2.3705 | 0.1645 |
| f_Lachnospiraceae.g_unclassified_f_Lachnospiraceae.s_Lachnospiraceae_bacterium_AM26_1LB  | 2.41E-04 | 1.19E-04 | 2.0599 | 0.2678 |
| f_Lachnospiraceae.g_unclassified_f_Lachnospiraceae.s_unclassified_f_Lachnospiraceae      | 1.52E-02 | 7.38E-03 | 3.6305 | 0.0923 |
| f_Odoribacteraceae.g_Butyricimonas                                                       | 9.27E-04 | 1.88E-03 | 2.7167 | 0.1512 |
| f_Odoribacteraceae.g_Butyricimonas.s_Butyricimonas_virosa                                | 9.27E-04 | 1.88E-03 | 2.7167 | 0.1893 |
| f_Odoribacteraceae.g_Odoribacter.s_Odoribacter_laneus                                    | 1.57E-05 | 2.77E-05 | 2.5694 | 0.0923 |
| f_Odoribacteraceae.g_unclassified_f_Odoribacteraceae                                     | 1.59E-04 | 3.04E-04 | 2.0405 | 0.0926 |
| f_Odoribacteraceae.g_unclassified_f_Odoribacteraceae.s_unclassified_f_Odoribacteraceae   | 1.59E-04 | 3.04E-04 | 2.0405 | 0.1070 |
| f_Oscillospiraceae                                                                       | 3.42E-03 | 7.92E-03 | 3.4752 | 0.3448 |
| f_Oscillospiraceae.g_Oscillibacter                                                       | 3.00E-03 | 7.41E-03 | 3.4649 | 0.2226 |
| f_Oscillospiraceae.g_Oscillibacter.s_Oscillibacter_sp_                                   | 1.34E-03 | 4.70E-03 | 3.3430 | 0.1893 |
| f_Oscillospiraceae.g_Oscillibacter.s_unclassified_g_Oscillibacter                        | 1.53E-04 | 2.13E-04 | 2.0726 | 0.1645 |
| f_Oscillospiraceae.g_Oscillibacter.s_uncultured_Oscillibacter_sp_                        | 9.67E-05 | 1.38E-04 | 2.1009 | 0.1645 |
| f_Peptostreptococcaceae.g_Romboutsia                                                     | 1.84E-03 | 2.51E-04 | 2.9368 | 0.1123 |
| f_Peptostreptococcaceae.g_Romboutsia.s_Romboutsia_timonensis                             | 1.84E-03 | 2.51E-04 | 2.9368 | 0.1382 |
| f_Prevotellaceae.g_Prevotella.s_Prevotella_bivia                                         | 2.92E-04 | 3.79E-04 | 2.1927 | 0.2640 |
| f_Rikenellaceae.g_Alistipes.s_Alistipes_finegoldii                                       | 8.96E-04 | 1.38E-03 | 2.5993 | 0.2640 |
| f_Rikenellaceae.g_Alistipes.s_Alistipes_senegalensis                                     | 2.82E-04 | 5.15E-04 | 2.2412 | 0.0628 |
| f_Rikenellaceae.g_Alistipes.s_Alistipes_shahii                                           | 1.58E-03 | 2.02E-03 | 2.7077 | 0.1070 |
| f_Rikenellaceae.g_Alistipes.s_Alistipes_sp_AF14_19                                       | 2.87E-04 | 3.47E-04 | 2.0950 | 0.2054 |
| f_Rikenellaceae.g_Alistipes.s_Alistipes_sp_HGB5                                          | 2.71E-04 | 4.31E-04 | 2.1785 | 0.1893 |



|                                                                                         |          |          |        |        |
|-----------------------------------------------------------------------------------------|----------|----------|--------|--------|
| f_Rikenellaceae.g_Alistipes.s_unclassified.g_Alistipes                                  | 4.07E-03 | 5.67E-03 | 3.1700 | 0.1893 |
| f_Rikenellaceae.g_unclassified.f_Rikenellaceae                                          | 7.84E-04 | 4.91E-04 | 2.3014 | 0.1294 |
| f_Rikenellaceae.g_unclassified.f_Rikenellaceae.s_Rikenellaceae_bacterium                | 7.84E-04 | 4.91E-04 | 2.3014 | 0.1645 |
| f_Ruminococcaceae.g_Anaerotruncus                                                       | 3.97E-04 | 5.24E-04 | 2.1297 | 0.1512 |
| f_Ruminococcaceae.g_Anaerotruncus.s_Anaerotruncus_colihominis                           | 3.97E-04 | 5.24E-04 | 2.1297 | 0.2054 |
| f_Ruminococcaceae.g_Faecalibacterium.s_uncultured_Faecalibacterium_sp_                  | 7.57E-04 | 5.60E-04 | 2.2006 | 0.2559 |
| f_Ruminococcaceae.g_Massilimaliae                                                       | 1.83E-05 | 5.32E-05 | 2.2059 | 0.0926 |
| f_Ruminococcaceae.g_Massilimaliae.s_Massilimaliae_massiliensis                          | 1.83E-05 | 5.32E-05 | 2.2059 | 0.1085 |
| f_Ruminococcaceae.g_Ruminococcus.s_Ruminococcus_gnavus_CAG_126                          | 3.61E-05 | 1.13E-05 | 2.6911 | 0.1893 |
| f_Ruminococcaceae.g_Ruminococcus.s_Ruminococcus_sp_AM45_9BH                             | 3.74E-05 | 2.14E-05 | 2.8698 | 0.1893 |
| f_Ruminococcaceae.g_Ruminococcus.s_unclassified.g_Ruminococcus                          | 1.30E-02 | 8.56E-03 | 3.4539 | 0.2542 |
| f_Ruminococcaceae.g_unclassified.f_Ruminococcaceae                                      | 5.75E-03 | 9.24E-03 | 3.4014 | 0.1274 |
| f_Ruminococcaceae.g_unclassified.f_Ruminococcaceae.s_Ruminococcaceae_bacterium          | 4.15E-03 | 7.46E-03 | 3.3686 | 0.1093 |
| f_Ruminococcaceae.g_unclassified.f_Ruminococcaceae.s_unclassified.f_Ruminococcaceae     | 7.14E-04 | 7.51E-04 | 2.1955 | 0.1645 |
| f_Tannerellaceae                                                                        | 1.27E-02 | 1.42E-02 | 3.3216 | 0.2703 |
| f_Tannerellaceae.g_Parabacteroides                                                      | 1.27E-02 | 1.40E-02 | 3.3066 | 0.1512 |
| f_Tannerellaceae.g_Parabacteroides.s_Parabacteroides_johnsonii                          | 5.91E-04 | 1.27E-03 | 2.8290 | 0.2751 |
| f_Tannerellaceae.g_Parabacteroides.s_Parabacteroides_merdae                             | 2.91E-03 | 5.72E-03 | 3.3139 | 0.1551 |
| f_unclassified_o_Clostridiales.g_Evtepia                                                | 2.58E-04 | 5.97E-04 | 2.4512 | 0.1512 |
| f_unclassified_o_Clostridiales.g_Evtepia.s_Evtepia_gabavorous                           | 2.58E-04 | 5.97E-04 | 2.4512 | 0.2042 |
| f_unclassified_o_Clostridiales.g_Intestinimonas                                         | 1.91E-04 | 4.69E-04 | 2.3257 | 0.1123 |
| f_unclassified_o_Clostridiales.g_Intestinimonas.s_Intestinimonas_butyriciproducens      | 1.91E-04 | 4.69E-04 | 2.3257 | 0.1364 |
| f_unclassified_o_Clostridiales.g_Lawsonibacter                                          | 1.28E-04 | 2.29E-04 | 2.0810 | 0.1682 |
| f_unclassified_o_Clostridiales.g_Lawsonibacter.s_Lawsonibacter_asaccharolyticus         | 1.28E-04 | 2.29E-04 | 2.0810 | 0.2127 |
| f_unclassified_o_Clostridiales.g_unclassified_o_Clostridiales.s_Clostridiales_bacterium | 4.08E-03 | 1.14E-02 | 3.6865 | 0.1085 |
| f_unclassified_p_Firmicutes.g_unclassified_p_Firmicutes.s_Firmicutes_bacterium_AF12_30  | 2.34E-04 | 7.85E-05 | 2.2576 | 0.1070 |

|                                                                                        |          |          |        |        |
|----------------------------------------------------------------------------------------|----------|----------|--------|--------|
| f_unclassified_p_Firmicutes.g_unclassified_p_Firmicutes.s_Firmicutes_bacterium_CAG_114 | 7.66E-05 | 1.47E-04 | 2.1954 | 0.2542 |
| f_unclassified_p_Firmicutes.g_unclassified_p_Firmicutes.s_Firmicutes_bacterium_CAG_137 | 9.08E-05 | 2.32E-04 | 2.0756 | 0.2542 |
| f_unclassified_p_Firmicutes.g_unclassified_p_Firmicutes.s_Firmicutes_bacterium_CAG_341 | 1.38E-04 | 6.29E-04 | 2.5903 | 0.1085 |

---

Abbreviations: HC, healthy control; T1D, type 1 diabetes; LDA, linear discriminant analysis; FDR, false discovery rate.

**Supplementary Table 3.** The bacteria differentially abundance between patients with T2D and HC.

| Species                                                          | Mean relative abundance |          | Lefse Analysis |        |
|------------------------------------------------------------------|-------------------------|----------|----------------|--------|
|                                                                  | HC                      | T2D      | LDA score      | FDR    |
| f_Bacteroidaceae                                                 | 1.61E-01                | 2.27E-01 | 4.5818         | 0.2678 |
| f_Bacteroidaceae.g_Bacteroides                                   | 1.60E-01                | 2.26E-01 | 4.5788         | 0.2766 |
| f_Bacteroidaceae.g_Bacteroides.s_Bacteroides_cellulosilyticus    | 1.17E-03                | 2.66E-03 | 3.0660         | 0.1280 |
| f_Bacteroidaceae.g_Bacteroides.s_Bacteroides_clarus              | 5.25E-04                | 8.35E-04 | 2.4712         | 0.1886 |
| f_Bacteroidaceae.g_Bacteroides.s_Bacteroides_eggerthii           | 1.10E-03                | 3.28E-03 | 3.0868         | 0.2585 |
| f_Bacteroidaceae.g_Bacteroides.s_Bacteroides_fluxus              | 4.06E-04                | 9.93E-04 | 2.3775         | 0.2715 |
| f_Bacteroidaceae.g_Bacteroides.s_Bacteroides_intestinalis        | 1.21E-03                | 2.42E-03 | 3.2382         | 0.0894 |
| f_Bacteroidaceae.g_Bacteroides.s_Bacteroides_oleiciplenus        | 1.84E-04                | 6.34E-04 | 2.5234         | 0.1280 |
| f_Bacteroidaceae.g_Bacteroides.s_Bacteroides_salyersiae          | 7.43E-04                | 2.25E-03 | 2.9794         | 0.1453 |
| f_Bacteroidaceae.g_Bacteroides.s_Bacteroides_sp_1_1_14           | 1.53E-04                | 2.69E-04 | 2.6328         | 0.2832 |
| f_Bacteroidaceae.g_Bacteroides.s_Bacteroides_sp_4_1_36           | 2.84E-04                | 6.42E-04 | 2.4789         | 0.1949 |
| f_Bacteroidaceae.g_Bacteroides.s_Bacteroides_sp_A1C1             | 7.00E-05                | 1.31E-04 | 2.8499         | 0.1818 |
| f_Bacteroidaceae.g_Bacteroides.s_Bacteroides_sp_AF26_10BH        | 3.09E-05                | 8.08E-05 | 2.7388         | 0.1948 |
| f_Bacteroidaceae.g_Bacteroides.s_Bacteroides_sp_AR29             | 1.01E-04                | 2.39E-04 | 2.5009         | 0.2715 |
| f_Bacteroidaceae.g_Bacteroides.s_Bacteroides_sp_D20              | 3.37E-04                | 7.19E-04 | 2.4254         | 0.2597 |
| f_Bacteroidaceae.g_Bacteroides.s_Bacteroides_uniformis           | 7.00E-03                | 1.52E-02 | 3.6183         | 0.1948 |
| f_Bacteroidaceae.g_Bacteroides.s_Bacteroides_uniformis_CAG_3     | 1.28E-04                | 2.89E-04 | 2.4617         | 0.1280 |
| f_Bacteroidaceae.g_Bacteroides.s_uncultured_Bacteroides_sp_      | 6.23E-04                | 8.22E-04 | 2.5061         | 0.1886 |
| f_Bifidobacteriaceae.g_Bifidobacterium.s_Bifidobacterium_bifidum | 1.36E-04                | 1.95E-04 | 2.3776         | 0.2715 |
| f_Clostridiaceae.g_Butyricicoccus                                | 2.21E-03                | 2.08E-03 | 2.5832         | 0.2613 |
| f_Clostridiaceae.g_Butyricicoccus.s_Butyricicoccus_sp_AF10_3     | 9.67E-05                | 6.24E-05 | 2.8167         | 0.1453 |
| f_Clostridiaceae.g_Butyricicoccus.s_Butyricicoccus_sp_AM27_36    | 2.05E-04                | 1.88E-04 | 2.5992         | 0.2658 |

|                                                                              |          |          |        |        |
|------------------------------------------------------------------------------|----------|----------|--------|--------|
| f__Clostridiaceae.g__Butyricicoccus.s__Butyricicoccus_sp__AM28_25            | 2.22E-04 | 2.18E-04 | 2.6231 | 0.1917 |
| f__Clostridiaceae.g__Butyricicoccus.s__uncultured__Butyricicoccus_sp__       | 1.99E-04 | 1.66E-04 | 2.6091 | 0.1755 |
| f__Clostridiaceae.g__Clostridium.s__Clostridium_sp__27_14                    | 8.86E-05 | 1.19E-04 | 2.4868 | 0.1948 |
| f__Clostridiaceae.g__Clostridium.s__Clostridium_sp__AM51_4                   | 2.54E-04 | 1.35E-04 | 2.5247 | 0.2585 |
| f__Clostridiaceae.g__Clostridium.s__Clostridium_sp__SS2_1                    | 4.22E-04 | 2.52E-04 | 2.3542 | 0.1362 |
| f__Clostridiaceae.g__Clostridium.s__Clostridium_sp__TF06_15AC                | 1.01E-04 | 6.62E-05 | 2.8375 | 0.2832 |
| f__Clostridiaceae.g__Clostridium.s__uncultured__Clostridium_sp__             | 3.02E-03 | 2.46E-03 | 2.6853 | 0.2715 |
| f__Desulfovibrionaceae                                                       | 1.13E-03 | 2.11E-03 | 2.8709 | 0.2198 |
| f__Desulfovibrionaceae.g__Bilophila                                          | 1.13E-03 | 2.11E-03 | 2.8709 | 0.1886 |
| f__Desulfovibrionaceae.g__Bilophila.s__Bilophila_sp__4_1_30                  | 1.56E-04 | 3.18E-04 | 2.6017 | 0.1518 |
| f__Desulfovibrionaceae.g__Bilophila.s__Bilophila_wadsworthia                 | 7.84E-04 | 1.43E-03 | 2.7034 | 0.1948 |
| f__Desulfovibrionaceae.g__Bilophila.s__unclassified_g__Bilophila             | 1.95E-04 | 3.67E-04 | 2.3373 | 0.1781 |
| f__Erysipelotrichaceae.g__Catenibacterium                                    | 1.69E-04 | 4.17E-04 | 2.4815 | 0.0801 |
| f__Erysipelotrichaceae.g__Catenibacterium.s__Catenibacterium_mitsuokai       | 1.69E-04 | 4.17E-04 | 2.4815 | 0.1280 |
| f__Eubacteriaceae.g__Eubacterium.s__Eubacterium_rectale_CAG_36               | 1.81E-04 | 5.31E-05 | 2.7300 | 0.1948 |
| f__Eubacteriaceae.g__Eubacterium.s__Eubacterium_sp__                         | 5.95E-03 | 3.11E-03 | 3.3105 | 0.2832 |
| f__Eubacteriaceae.g__Eubacterium.s__Eubacterium_sp__36_13                    | 2.30E-03 | 8.41E-04 | 3.0604 | 0.1610 |
| f__Eubacteriaceae.g__Eubacterium.s__Eubacterium_sp__41_20                    | 1.78E-04 | 5.60E-05 | 2.9218 | 0.1280 |
| f__Eubacteriaceae.g__Eubacterium.s__Eubacterium_sp__CAG_86                   | 1.28E-03 | 4.60E-04 | 2.8291 | 0.1886 |
| f__Lachnospiraceae                                                           | 1.42E-01 | 9.30E-02 | 4.4745 | 0.0616 |
| f__Lachnospiraceae.g__Anaerostipes                                           | 4.22E-03 | 2.28E-03 | 3.1184 | 0.1886 |
| f__Lachnospiraceae.g__Anaerostipes.s__Anaerostipes_hadrus                    | 4.22E-03 | 2.28E-03 | 3.1184 | 0.1886 |
| f__Lachnospiraceae.g__Blautia.s__Blautia_sp__CAG_37                          | 3.74E-04 | 2.16E-04 | 2.4918 | 0.1917 |
| f__Lachnospiraceae.g__Mediterraneibacter.s__Mediterraneibacter_butyricigenes | 9.03E-05 | 7.94E-05 | 3.1273 | 0.2715 |
| f__Lachnospiraceae.g__Roseburia                                              | 4.13E-02 | 2.77E-02 | 3.9926 | 0.1886 |
| f__Lachnospiraceae.g__Roseburia.s__Roseburia_faecis                          | 3.43E-03 | 2.70E-03 | 2.8277 | 0.2038 |

|                                                                                          |          |          |        |        |
|------------------------------------------------------------------------------------------|----------|----------|--------|--------|
| f_Lachnospiraceae.g_Roseburia.s_Roseburia_intestinalis                                   | 9.21E-03 | 4.25E-03 | 3.5894 | 0.1518 |
| f_Lachnospiraceae.g_Roseburia.s_Roseburia_intestinalis_CAG_13                            | 2.65E-04 | 1.24E-04 | 2.4986 | 0.1818 |
| f_Lachnospiraceae.g_Roseburia.s_Roseburia_sp_AM23_20                                     | 8.46E-04 | 7.41E-04 | 2.6077 | 0.1280 |
| f_Lachnospiraceae.g_Roseburia.s_Roseburia_sp_MUC_MUC_530_WT_4D                           | 8.71E-05 | 7.28E-05 | 2.9640 | 0.1631 |
| f_Lachnospiraceae.g_Roseburia.s_Roseburia_sp_OF03_24                                     | 7.85E-04 | 7.10E-04 | 2.5685 | 0.1280 |
| f_Lachnospiraceae.g_Roseburia.s_Roseburia_sp_TF10_5                                      | 2.23E-03 | 1.74E-03 | 2.6361 | 0.2832 |
| f_Lachnospiraceae.g_Roseburia.s_unclassified.g_Roseburia                                 | 6.87E-03 | 5.38E-03 | 3.1885 | 0.1290 |
| f_Lachnospiraceae.g_unclassified.f_Lachnospiraceae                                       | 4.23E-02 | 2.20E-02 | 4.0952 | 0.0385 |
| f_Lachnospiraceae.g_unclassified.f_Lachnospiraceae.s_Eubacterium_rectale                 | 2.14E-02 | 7.51E-03 | 3.9211 | 0.1280 |
| f_Lachnospiraceae.g_unclassified.f_Lachnospiraceae.s_Lachnospiraceae_bacterium_5_1_63FAA | 2.00E-04 | 1.20E-04 | 2.4412 | 0.2832 |
| f_Lachnospiraceae.g_unclassified.f_Lachnospiraceae.s_Lachnospiraceae_bacterium_AM26_1LB  | 2.41E-04 | 1.19E-04 | 2.4225 | 0.2585 |
| f_Lachnospiraceae.g_unclassified.f_Lachnospiraceae.s_unclassified.f_Lachnospiraceae      | 1.52E-02 | 7.38E-03 | 3.5871 | 0.1280 |
| f_Odoribacteraceae.g_Odoribacter.s_Odoribacter_laneus                                    | 1.57E-05 | 2.77E-05 | 3.0212 | 0.1280 |
| f_Peptostreptococcaceae.g_Romboutsia                                                     | 1.84E-03 | 2.51E-04 | 2.9088 | 0.2613 |
| f_Peptostreptococcaceae.g_Romboutsia.s_Romboutsia_timonensis                             | 1.84E-03 | 2.51E-04 | 2.9088 | 0.2267 |
| f_Prevotellaceae.g_Prevotella.s_Prevotella_bivia                                         | 2.92E-04 | 3.79E-04 | 2.4477 | 0.2887 |
| f_Ruminococcaceae.g_Agathobaculum                                                        | 3.18E-04 | 2.63E-04 | 2.3763 | 0.0336 |
| f_Ruminococcaceae.g_Agathobaculum.s_Agathobaculum_butyriciproducens                      | 3.18E-04 | 2.63E-04 | 2.3763 | 0.0894 |
| f_Ruminococcaceae.g_Faecalibacterium                                                     | 5.48E-02 | 4.36E-02 | 4.1068 | 0.0336 |
| f_Ruminococcaceae.g_Faecalibacterium.s_Faecalibacterium_prausnitzii                      | 3.64E-02 | 2.75E-02 | 3.9625 | 0.0894 |
| f_Ruminococcaceae.g_Faecalibacterium.s_Faecalibacterium_sp_                              | 2.49E-03 | 1.82E-03 | 2.7738 | 0.1132 |
| f_Ruminococcaceae.g_Faecalibacterium.s_Faecalibacterium_sp_AF10_46                       | 5.57E-04 | 3.67E-04 | 2.3403 | 0.1280 |
| f_Ruminococcaceae.g_Faecalibacterium.s_Faecalibacterium_sp_AF27_11BH                     | 4.95E-04 | 3.34E-04 | 2.3405 | 0.1280 |
| f_Ruminococcaceae.g_Faecalibacterium.s_Faecalibacterium_sp_AF28_13AC                     | 3.04E-05 | 3.64E-05 | 3.1619 | 0.1280 |
| f_Ruminococcaceae.g_Faecalibacterium.s_Faecalibacterium_sp_AM43_5AT                      | 6.08E-04 | 4.21E-04 | 2.2648 | 0.1290 |
| f_Ruminococcaceae.g_Faecalibacterium.s_Faecalibacterium_sp_OM04_11BH                     | 2.76E-04 | 1.92E-04 | 2.3960 | 0.1948 |

|                                                                                                        |          |          |        |        |
|--------------------------------------------------------------------------------------------------------|----------|----------|--------|--------|
| f__Ruminococcaceae.g__Faecalibacterium.s__unclassified.g__Faecalibacterium                             | 1.10E-02 | 9.68E-03 | 3.4103 | 0.0894 |
| f__Ruminococcaceae.g__Faecalibacterium.s__uncultured_Faecalibacterium_sp__                             | 7.57E-04 | 5.60E-04 | 2.3249 | 0.1280 |
| f__Ruminococcaceae.g__Flavonifractor                                                                   | 1.19E-03 | 1.56E-03 | 2.8108 | 0.2766 |
| f__Ruminococcaceae.g__Flavonifractor.s__Flavonifractor_plautii                                         | 1.19E-03 | 1.56E-03 | 2.8108 | 0.2726 |
| f__Ruminococcaceae.g__Subdoligranulum.s__Subdoligranulum_sp__OF01_18                                   | 1.34E-04 | 1.96E-04 | 2.5081 | 0.2832 |
| f__Tannerellaceae                                                                                      | 1.27E-02 | 1.42E-02 | 3.3107 | 0.2225 |
| f__Tannerellaceae.g__Parabacteroides                                                                   | 1.27E-02 | 1.40E-02 | 3.3053 | 0.2613 |
| f__unclassified_o__Clostridiales.g__unclassified_o__Clostridiales.s__Bacteroides_pectinophilus         | 2.12E-04 | 1.56E-04 | 2.8481 | 0.1280 |
| f__unclassified_o__Clostridiales.g__unclassified_o__Clostridiales.s__Clostridiales_bacterium_36_14     | 1.84E-04 | 1.27E-04 | 2.9128 | 0.1755 |
| f__unclassified_o__Clostridiales.g__unclassified_o__Clostridiales.s__Clostridiales_bacterium_Nov_37_41 | 9.03E-05 | 6.87E-05 | 2.8225 | 0.2591 |
| f__unclassified_p__Firmicutes.g__unclassified_p__Firmicutes.s__Firmicutes_bacterium_AF12_30            | 2.34E-04 | 7.85E-05 | 2.5140 | 0.1280 |
| f__unclassified_p__Firmicutes.g__unclassified_p__Firmicutes.s__Firmicutes_bacterium_AF16_15            | 8.23E-05 | 9.42E-05 | 2.7039 | 0.2036 |

---

Abbreviations: HC, healthy control; T2D, type 2 diabetes; LDA, linear discriminant analysis; FDR, false discovery rate.

**Supplementary Table 4.** The viruses differentially abundance between patients with adult-onset T1D and HC.

| Species                                                                                     | Mean relative abundance |                 | Lefse Analysis |        |
|---------------------------------------------------------------------------------------------|-------------------------|-----------------|----------------|--------|
|                                                                                             | HC                      | Adult-onset T1D | LDA score      | FDR    |
| f_Myoviridae.g_Punavirus                                                                    | 1.24E-06                | 3.59E-08        | 4.3120         | 0.1077 |
| f_Myoviridae.g_Punavirus.s_Salmonella_virus_SJ46                                            | 1.24E-06                | 3.59E-08        | 4.3301         | 0.2399 |
| f_Myoviridae.g_unclassified_f_Myoviridae.s_Myoviridae_sp_                                   | 1.11E-07                | 4.41E-06        | 3.5316         | 0.3648 |
| f_unclassified_o_Caudovirales                                                               | 5.95E-06                | 1.84E-06        | 4.4898         | 0.0132 |
| f_unclassified_o_Caudovirales.g_unclassified_o_Caudovirales                                 | 5.95E-06                | 1.84E-06        | 4.5041         | 0.0291 |
| f_unclassified_o_Caudovirales.g_unclassified_o_Caudovirales.s_uncultured_Caudovirales_phage | 5.95E-06                | 1.84E-06        | 4.5018         | 0.0648 |

Abbreviations: HC, healthy control; T1D, type 1 diabetes; LDA, linear discriminant analysis; FDR, false discovery rate.

**Supplementary Table 5.** The viruses differentially abundance between patients with T2D and HC.

| Species                                                                   | Mean relative abundance |          | Lefse Analysis |        |
|---------------------------------------------------------------------------|-------------------------|----------|----------------|--------|
|                                                                           | HC                      | T2D      | LDA score      | FDR    |
| f_Herpesviridae                                                           | 4.97E-07                | 9.62E-08 | 3.7804         | 0.1258 |
| f_Herpesviridae.g_Varicellovirus                                          | 4.97E-07                | 9.62E-08 | 3.7394         | 0.2347 |
| f_Herpesviridae.g_Varicellovirus.s_Human_alphaherpesvirus_3               | 4.97E-07                | 9.62E-08 | 3.8048         | 0.4149 |
| f_Siphoviridae.g_Cequinquevirus                                           | 4.53E-07                | 1.78E-06 | 3.6772         | 0.2436 |
| f_Siphoviridae.g_unclassified_f_Siphoviridae.s_Butyrovibrio_virus_Bo_Finn | 1.72E-07                | 0.00E+00 | 3.5552         | 0.4149 |

Abbreviations: HC, healthy control; T2D, type 2 diabetes; LDA, linear discriminant analysis; FDR, false discovery rate.



**Supplementary Table 6.** The fungi differentially abundance between patients with T2D and HC.

| Species                                                            | Mean relative abundance |          | Lefse Analysis |        |
|--------------------------------------------------------------------|-------------------------|----------|----------------|--------|
|                                                                    | HC                      | T2D      | LDA score      | FDR    |
| f__Metschnikowiaceae                                               | 4.66E-08                | 2.77E-08 | 4.5086         | 0.0468 |
| f__Metschnikowiaceae.g__Clavispora                                 | 1.51E-07                | 1.49E-08 | 4.4814         | 0.0510 |
| f__Metschnikowiaceae.g__Clavispora.s__Candida__intermedia          | 4.66E-08                | 2.77E-08 | 4.4850         | 0.0510 |
| f__Venturiaceae                                                    | 4.66E-08                | 2.77E-08 | 4.2474         | 0.0468 |
| f__Venturiaceae.g__Venturia_f__Venturiaceae                        | 1.51E-07                | 1.49E-08 | 4.2670         | 0.0510 |
| f__Venturiaceae.g__Venturia_f__Venturiaceae.s__Venturia__nashicola | 1.51E-07                | 1.49E-08 | 4.2427         | 0.0510 |

Abbreviations: HC, healthy control; T2D, type 2 diabetes; LDA, linear discriminant analysis; FDR, false discovery rate.

**Supplementary Table 7.** The faecal metabolites differentially abundance between patients with adult-onset T1D and HC.

| <b>Metabolite</b>                           | <b>VIP</b> | <b>P value</b> | <b>FDR</b> | <b>FC (Adult-onset T1D/HC)</b> |
|---------------------------------------------|------------|----------------|------------|--------------------------------|
| Sarcosine                                   | 1.0433     | 0.0101         | 0.0712     | 0.8623                         |
| Creatine                                    | 1.7973     | 0.0072         | 0.0705     | 0.7215                         |
| Gallic acid                                 | 1.8367     | 0.0324         | 0.0997     | 0.7846                         |
| 4-Hydroxybenzoic acid                       | 0.9846     | 0.0181         | 0.0736     | 0.8275                         |
| Hippuric acid                               | 0.4254     | 0.0335         | 0.0997     | 0.7389                         |
| Ethylmethylacetic acid                      | 0.8342     | 0.0061         | 0.0698     | 1.0862                         |
| Phenylacetic acid                           | 1.0808     | 0.0162         | 0.0736     | 1.1069                         |
| Indole-3-carboxylic acid                    | 0.3030     | 0.0195         | 0.0749     | 1.1982                         |
| N-Acetyltryptophan                          | 0.2978     | 0.0218         | 0.0793     | 0.9269                         |
| Cinnamic acid                               | 0.1841     | 0.0039         | 0.0698     | 1.1772                         |
| N-Phenylacetylphenylalanine                 | 0.2216     | 0.0114         | 0.0712     | 1.0450                         |
| Azelaic acid                                | 0.5411     | 0.0324         | 0.0997     | 1.1106                         |
| Methylmalonic acid                          | 0.9015     | 0.0144         | 0.0736     | 0.8842                         |
| 4-Aminohippuric acid                        | 0.1637     | 0.0144         | 0.0736     | 0.9367                         |
| Rhamnose                                    | 0.7296     | 0.0150         | 0.0736     | 0.9335                         |
| 3-(3-Hydroxyphenyl)-3-hydroxypropanoic acid | 1.9112     | 0.0061         | 0.0698     | 0.6564                         |
| Isobutyric acid                             | 0.6761     | 0.0039         | 0.0698     | 1.0791                         |
| Isovaleric acid                             | 0.9735     | 0.0045         | 0.0698     | 1.1190                         |
| Octanoic acid                               | 1.1355     | 0.0013         | 0.0698     | 1.1818                         |
| Succinic acid                               | 0.5980     | 0.0082         | 0.0705     | 0.8935                         |
| Isocitric acid                              | 0.9234     | 0.0347         | 0.0997     | 0.6549                         |
| Malonic acid                                | 1.3757     | 0.0281         | 0.0971     | 0.8595                         |
| Phenyllactic acid                           | 0.7032     | 0.0114         | 0.0712     | 1.2326                         |

Abbreviations: HC, healthy control; T1D, type 1 diabetes; VIP, variable importance in projection; FDR, false discovery rate; FC, fold change.

**Supplementary Table 8.** The faecal metabolites differentially abundance between patients with T2D and HC.

| <b>Metabolite</b>                           | <b>VIP</b> | <b>P value</b> | <b>FDR</b> | <b>FC (T2D/HC)</b> |
|---------------------------------------------|------------|----------------|------------|--------------------|
| L-Lysine                                    | 0.3040     | 0.0233         | 0.0847     | 0.9768             |
| Indole-3-methyl acetate                     | 0.2862     | 0.0271         | 0.0889     | 1.1406             |
| Ethylmethylacetic acid                      | 1.5378     | 0.0001         | 0.0031     | 1.0953             |
| 2-Hydroxycaproic acid                       | 0.4059     | 0.0041         | 0.0314     | 1.5668             |
| Phenylacetic acid                           | 1.9738     | 0.0005         | 0.0073     | 1.1152             |
| Indole-3-carboxylic acid                    | 0.5278     | 0.0351         | 0.0967     | 1.1325             |
| N-Acetyltryptophan                          | 0.0464     | 0.0248         | 0.0855     | 0.9366             |
| Indole-3-propionic acid                     | 0.2104     | 0.0121         | 0.0596     | 0.8652             |
| N-Phenylacetylphenylalanine                 | 0.3707     | 0.0018         | 0.0209     | 1.1174             |
| Methylmalonic acid                          | 0.9217     | 0.0331         | 0.0952     | 0.8908             |
| Pyroglutamic acid                           | 0.6225     | 0.0117         | 0.0596     | 1.0387             |
| 4-Aminohippuric acid                        | 0.0344     | 0.0156         | 0.0674     | 0.9274             |
| alpha-Hydroxyisobutyric acid                | 0.2061     | 0.0371         | 0.0984     | 0.8427             |
| 3-(3-Hydroxyphenyl)-3-hydroxypropanoic acid | 2.0115     | 0.0147         | 0.0674     | 0.6980             |
| Isobutyric acid                             | 1.2348     | 0.0001         | 0.0025     | 1.0921             |
| Isovaleric acid                             | 1.5643     | 0.0004         | 0.0061     | 1.1268             |
| Methylglutaric acid                         | 1.1718     | 0.0167         | 0.0676     | 1.2166             |
| Citric acid                                 | 0.6716     | 0.0070         | 0.0485     | 0.8169             |
| Oxoglutaric acid                            | 1.3334     | 0.0322         | 0.0952     | 1.1017             |
| Octanoic acid                               | 1.2804     | 0.0090         | 0.0515     | 1.1383             |
| Succinic acid                               | 0.6032     | 0.0021         | 0.0211     | 0.8848             |
| Isocitric acid                              | 0.8737     | 0.0177         | 0.0680     | 0.6741             |
| Kynurenine                                  | 0.4901     | 0.0041         | 0.0314     | 1.3907             |
| L-Glutamic acid                             | 0.5571     | 0.0084         | 0.0515     | 1.0433             |
| Phenyllactic acid                           | 0.7417     | 0.0331         | 0.0952     | 1.1608             |

Abbreviations: HC, healthy control; T2D, type 2 diabetes; VIP, variable importance in projection; FDR, false discovery rate; FC, fold change.

**Supplementary Table 9.** The serum metabolites differentially abundance between patients with adult-onset T1D and HC.

| <b>Metabolite</b>               | <b>VIP</b> | <b>P value</b> | <b>FDR</b> | <b>FC (Adult-onset T1D/HC)</b> |
|---------------------------------|------------|----------------|------------|--------------------------------|
| Benzoic acid                    | 3.3690     | 0.0001         | 0.0017     | 0.7515                         |
| 3-Hydroxybutyric acid           | 3.2314     | 0.0000         | 0.0006     | 1.2358                         |
| 3,4-Dihydroxyhydrocinnamic acid | 2.7390     | 0.0000         | 0.0000     | 0.6825                         |
| Butyric acid                    | 2.4838     | 0.0015         | 0.0130     | 0.6953                         |
| Propionic acid                  | 2.2024     | 0.0008         | 0.0085     | 0.7698                         |
| Hydroxypropionic acid           | 1.9033     | 0.0196         | 0.0568     | 0.8109                         |
| Acetic acid                     | 1.8626     | 0.0050         | 0.0283     | 1.1613                         |
| Pyruvic acid                    | 1.8143     | 0.0085         | 0.0345     | 0.9411                         |
| Carnitine                       | 1.8008     | 0.0000         | 0.0006     | 0.8908                         |
| Lactic acid                     | 1.7849     | 0.0001         | 0.0016     | 0.9503                         |
| L-Aspartic acid                 | 1.7596     | 0.0001         | 0.0017     | 0.8978                         |
| N-Methylnicotinamide            | 1.6482     | 0.0043         | 0.0280     | 1.3654                         |
| Oxalic acid                     | 1.5105     | 0.0289         | 0.0773     | 0.8524                         |
| L-Tyrosine                      | 1.4999     | 0.0000         | 0.0004     | 0.9454                         |
| Kynurenine                      | 1.4849     | 0.0003         | 0.0042     | 0.8477                         |
| L-Glutamic acid                 | 1.4744     | 0.0161         | 0.0475     | 0.9071                         |
| Phenyllactic acid               | 1.4265     | 0.0001         | 0.0013     | 0.5917                         |
| Erythronic acid                 | 1.3846     | 0.0068         | 0.0313     | 0.8366                         |
| Creatine                        | 1.3704     | 0.0097         | 0.0345     | 0.9143                         |
| Ketoleucine                     | 1.3343     | 0.0131         | 0.0412     | 0.9232                         |
| Glyceric acid                   | 1.3225     | 0.0278         | 0.0759     | 0.8312                         |
| L-Histidine                     | 1.3003     | 0.0003         | 0.0041     | 0.9566                         |
| Dimethylglycine                 | 1.2901     | 0.0142         | 0.0429     | 0.8514                         |
| Ribulose                        | 1.2403     | 0.0016         | 0.0130     | 0.8899                         |
| L-Threonine                     | 1.2389     | 0.0072         | 0.0313     | 0.9503                         |
| Pyroglutamic acid               | 1.2356     | 0.0075         | 0.0313     | 0.9213                         |
| Methylmalonic acid              | 1.2332     | 0.0052         | 0.0283     | 0.9032                         |
| L-Glutamine                     | 1.2164     | 0.0007         | 0.0082     | 0.9700                         |
| Azelaic acid                    | 1.2158     | 0.0075         | 0.0313     | 0.5117                         |
| Malic acid                      | 1.2013     | 0.0136         | 0.0421     | 0.9129                         |
| N-Acetylneuraminic acid         | 1.1795     | 0.0022         | 0.0175     | 0.8098                         |
| 3-Methyl-2-oxopentanoic acid    | 1.1514     | 0.0221         | 0.0627     | 0.9520                         |
| Xylose                          | 1.1443     | 0.0323         | 0.0818     | 0.9095                         |
| Phenylpyruvic acid              | 1.1273     | 0.0024         | 0.0183     | 0.7919                         |
| Rhamnose                        | 1.0981     | 0.0115         | 0.0381     | 0.7818                         |
| Xylulose                        | 1.0864     | 0.0060         | 0.0283     | 0.8964                         |
| Acetylcarnitine                 | 1.0675     | 0.0093         | 0.0345     | 0.9392                         |
| L-Methionine                    | 1.0404     | 0.0010         | 0.0098     | 0.9500                         |
| L-Glycine                       | 1.0260     | 0.0050         | 0.0283     | 0.9637                         |
| Isovaleric acid                 | 1.0238     | 0.0335         | 0.0834     | 1.6044                         |

|                        |        |        |        |        |
|------------------------|--------|--------|--------|--------|
| Maleic acid            | 0.9899 | 0.0097 | 0.0345 | 0.8840 |
| L-Tryptophan           | 0.9755 | 0.0055 | 0.0283 | 0.9568 |
| Phthalic acid          | 0.8608 | 0.0007 | 0.0082 | 0.8255 |
| L-Valine               | 0.8194 | 0.0097 | 0.0345 | 0.9691 |
| N-Acetylserine         | 0.8054 | 0.0048 | 0.0283 | 0.8998 |
| Norleucine             | 0.7597 | 0.0097 | 0.0345 | 0.9605 |
| L-Serine               | 0.7390 | 0.0057 | 0.0283 | 0.9730 |
| L-Lysine               | 0.7174 | 0.0106 | 0.0358 | 0.9791 |
| Palmitoylcarnitine     | 0.6617 | 0.0028 | 0.0191 | 0.8066 |
| Homovanillic acid      | 0.5834 | 0.0028 | 0.0191 | 0.8560 |
| L-Leucine              | 0.5818 | 0.0323 | 0.0818 | 0.9818 |
| L-Asparagine           | 0.5652 | 0.0131 | 0.0412 | 0.9764 |
| 2-Phenylglycine        | 0.3858 | 0.0300 | 0.0788 | 0.9055 |
| Malonylcarnitine       | 0.2015 | 0.0102 | 0.0351 | 0.8480 |
| Citramalic acid        | 0.1592 | 0.0387 | 0.0948 | 0.8962 |
| L-Alanine              | 0.1310 | 0.0238 | 0.0664 | 1.0166 |
| Methylmalonylcarnitine | 0.1306 | 0.0060 | 0.0283 | 0.8214 |

---

Abbreviations: HC, healthy control; T1D, type 1 diabetes; VIP, variable importance in projection; FDR, false discovery rate; FC, fold change.

**Supplementary Table 10.** The serum metabolites differentially abundance between patients with T2D and HC.

| <b>Metabolite</b>               | <b>VIP</b> | <b>P value</b> | <b>FDR</b> | <b>FC (T2D/HC)</b> |
|---------------------------------|------------|----------------|------------|--------------------|
| Propionic acid                  | 2.8122     | 0.0000         | 0.0000     | 0.6747             |
| beta-Alanine                    | 2.7575     | 0.0003         | 0.0028     | 0.5721             |
| Palmitoleic acid                | 2.5492     | 0.0052         | 0.0179     | 0.6441             |
| Benzoic acid                    | 2.5476     | 0.0013         | 0.0059     | 0.7696             |
| Oxalic acid                     | 2.4934     | 0.0000         | 0.0003     | 0.7161             |
| Butyric acid                    | 2.1964     | 0.0006         | 0.0036     | 0.6956             |
| 3-Hydroxybutyric acid           | 2.1198     | 0.0005         | 0.0035     | 1.1427             |
| Hydroxypropionic acid           | 2.0373     | 0.0011         | 0.0058     | 0.7583             |
| L-Glycine                       | 2.0123     | 0.0000         | 0.0000     | 0.9246             |
| 2-Furoic acid                   | 1.9885     | 0.0004         | 0.0028     | 0.5044             |
| L-Threonine                     | 1.8416     | 0.0000         | 0.0000     | 0.9213             |
| Pipecolic acid                  | 1.7939     | 0.0101         | 0.0286     | 0.6824             |
| Glyceric acid                   | 1.7924     | 0.0003         | 0.0028     | 0.7006             |
| 2-Phenylpropionate              | 1.7126     | 0.0003         | 0.0028     | 0.5461             |
| L-Glutamine                     | 1.6986     | 0.0000         | 0.0000     | 0.9577             |
| Erythronic acid                 | 1.5709     | 0.0002         | 0.0020     | 0.7834             |
| Phenylpyruvic acid              | 1.5551     | 0.0000         | 0.0003     | 0.7358             |
| Hydrocinnamic acid              | 1.5076     | 0.0034         | 0.0124     | 0.4392             |
| Ketoleucine                     | 1.4722     | 0.0333         | 0.0738     | 0.9189             |
| Glycolic acid                   | 1.4371     | 0.0000         | 0.0005     | 0.8528             |
| Phenyllactic acid               | 1.4351     | 0.0000         | 0.0002     | 0.6238             |
| Threonic acid                   | 1.4017     | 0.0003         | 0.0028     | 0.8038             |
| Dodecanoic acid                 | 1.3757     | 0.0342         | 0.0747     | 0.6531             |
| L-Histidine                     | 1.3153     | 0.0000         | 0.0003     | 0.9534             |
| L-Methionine                    | 1.3082     | 0.0000         | 0.0003     | 0.9348             |
| Citrulline                      | 1.2824     | 0.0000         | 0.0002     | 0.9325             |
| Rhamnose                        | 1.2319     | 0.0091         | 0.0270     | 0.7752             |
| Azelaic acid                    | 1.2068     | 0.0024         | 0.0096     | 0.5094             |
| 2-Hydroxybutyric acid           | 1.1893     | 0.0009         | 0.0054     | 1.0680             |
| 3,4-Dihydroxyhydrocinnamic acid | 1.1794     | 0.0063         | 0.0205     | 0.8675             |
| Kynurenine                      | 1.1622     | 0.0010         | 0.0058     | 0.8770             |
| Isovaleric acid                 | 1.1589     | 0.0182         | 0.0452     | 1.4892             |
| Xylose                          | 1.1440     | 0.0011         | 0.0058     | 0.8896             |
| L-Arginine                      | 1.1161     | 0.0448         | 0.0908     | 0.8967             |
| Isobutyric acid                 | 1.1104     | 0.0273         | 0.0626     | 0.6817             |
| Carnitine                       | 1.0910     | 0.0015         | 0.0065     | 0.9313             |
| Citric acid                     | 1.0626     | 0.0004         | 0.0030     | 0.9629             |
| L-Serine                        | 1.0541     | 0.0012         | 0.0058     | 0.9633             |
| EPA                             | 1.0533     | 0.0073         | 0.0224     | 0.7244             |
| L-Tyrosine                      | 1.0464     | 0.0012         | 0.0058     | 0.9612             |
| L-Tryptophan                    | 1.0262     | 0.0012         | 0.0058     | 0.9608             |

|                                |        |        |        |        |
|--------------------------------|--------|--------|--------|--------|
| alpha-Linolenic acid           | 1.0246 | 0.0171 | 0.0433 | 0.9245 |
| L-Valine                       | 0.9822 | 0.0258 | 0.0601 | 0.9662 |
| N-Acetylneuraminic acid        | 0.9746 | 0.0068 | 0.0214 | 0.8336 |
| L-Asparagine                   | 0.9575 | 0.0005 | 0.0033 | 0.9655 |
| Methylmalonic acid             | 0.9276 | 0.0013 | 0.0059 | 0.9002 |
| N-Acetylserine                 | 0.8597 | 0.0061 | 0.0203 | 0.8825 |
| Phthalic acid                  | 0.8392 | 0.0013 | 0.0059 | 0.8477 |
| Aconitic acid                  | 0.8275 | 0.0029 | 0.0113 | 0.9624 |
| L-Lysine                       | 0.7617 | 0.0114 | 0.0312 | 0.9784 |
| 3-Methyl-2-oxopentanoic acid   | 0.7293 | 0.0436 | 0.0898 | 0.9645 |
| L-Proline                      | 0.6912 | 0.0171 | 0.0433 | 0.9785 |
| Arachidonic acid               | 0.6804 | 0.0392 | 0.0843 | 0.9507 |
| Oxoadipic acid                 | 0.6543 | 0.0101 | 0.0286 | 0.7859 |
| Myristoleic acid               | 0.6358 | 0.0425 | 0.0887 | 0.6852 |
| CDCA                           | 0.6219 | 0.0413 | 0.0876 | 0.8332 |
| Sebacic acid                   | 0.5789 | 0.0211 | 0.0516 | 0.8150 |
| Homocitrulline                 | 0.5787 | 0.0485 | 0.0956 | 0.8161 |
| L-Aspartic acid                | 0.5535 | 0.0472 | 0.0944 | 0.9653 |
| Indole-3-propionic acid        | 0.5156 | 0.0237 | 0.0570 | 0.8315 |
| GABA                           | 0.4649 | 0.0156 | 0.0418 | 0.8327 |
| Homovanillic acid              | 0.4507 | 0.0061 | 0.0203 | 0.8732 |
| Benzenebutanoic acid           | 0.4341 | 0.0026 | 0.0104 | 0.8410 |
| 2-Phenylglycine                | 0.4235 | 0.0080 | 0.0242 | 0.8978 |
| ortho-Hydroxyphenylacetic acid | 0.4199 | 0.0036 | 0.0129 | 0.7693 |
| Methylglutaric acid            | 0.3905 | 0.0281 | 0.0634 | 0.8012 |
| Adipoylcarnitine               | 0.3074 | 0.0032 | 0.0118 | 0.8527 |
| Methylmalonylcarnitine         | 0.2495 | 0.0024 | 0.0096 | 0.7344 |
| Malonylcarnitine               | 0.1930 | 0.0114 | 0.0312 | 0.8835 |
| Cinnamic acid                  | 0.1204 | 0.0251 | 0.0594 | 0.7892 |
| Citramalic acid                | 0.0233 | 0.0171 | 0.0433 | 0.9563 |

---

Abbreviations: HC, healthy control; T2D, type 2 diabetes; VIP, variable importance in projection; FDR, false discovery rate; FC, fold change.

**Supplementary Table 11.** The performances of all prediction models.

Random Forest Analysis

Patients with adult-onset T1D vs HC & patients with adult-onset T1D vs patients with T2D

Model 1: microbiome (6 species)

Model 2: faecal metabolome (6 faecal metabolites)

Model 3: microbiome (6 species) + faecal metabolome (6 faecal metabolites)

| Features                                                                                                                                                                 |                                                                                                                  |                                                                                          |
|--------------------------------------------------------------------------------------------------------------------------------------------------------------------------|------------------------------------------------------------------------------------------------------------------|------------------------------------------------------------------------------------------|
| Model 1                                                                                                                                                                  | Model 2                                                                                                          | Model 3                                                                                  |
| [Eubacterium] rectale<br>Parabacteroides johnsonii<br>Clostridium sp. CAG:575<br>Flavonifractor plautii<br>Bacteroides stercoris CAG:120<br>Firmicutes bacterium AF16-15 | Kynurenine<br>Citric acid<br>Indole-3-propionic acid<br>L-Lysine<br>N-Phenylacetylphenylalanine<br>Octanoic acid | Model 1 + Model 2                                                                        |
| Discovery:<br>Adult-onset T1D vs HC: AUC = 0.931<br>Adult-onset T1D vs T2D: AUC = 0.932                                                                                  | Discovery:<br>Adult-onset T1D vs HC: AUC = 0.836<br>Adult-onset T1D vs T2D: AUC = 0.844                          | Discovery:<br>Adult-onset T1D vs HC: AUC = 0.988<br>Adult-onset T1D vs T2D: AUC = 0.981  |
| Validation:<br>Adult-onset T1D vs HC: AUC = 0.729<br>Adult-onset T1D vs T2D: AUC = 0.784                                                                                 | Validation:<br>Adult-onset T1D vs HC: AUC = 0.657<br>Adult-onset T1D vs T2D: AUC = 0.644                         | Validation:<br>Adult-onset T1D vs HC: AUC = 0.824<br>Adult-onset T1D vs T2D: AUC = 0.812 |

Abbreviations: HC, healthy control; T1D, type 1 diabetes; T2D, type 2 diabetes; AUC: area under curve.
